# Supplementary material for: Stabilization of lead-free bulk CsSnI3 perovskite thermoelectrics via incorporation of TiS3 nanoribbon clusters
Source: Royal Society of Chemistry journal article supplement (doi:10.1039/d5dt00326a), 2025-01-01
Supplement: d5dt00326a4.pdf [file d5dt00326a4.pdf]

Ivanova *et al.* SUPPORTING INFORMATION FILE

## Stabilization of lead-free bulk CsSnI<sub>3</sub> perovskite thermoelectrics via incorporating TiS<sub>3</sub> nanoribbon clusters

Alexandra Ivanova,<sup>1,\*</sup> Lev Luchnikov,<sup>1</sup> Dmitry S. Muratov,<sup>2</sup> Margarita Golikova,<sup>1</sup> Danila Saranin,<sup>1</sup> Aleksandra Khanina,<sup>1</sup> Pavel Gostishchev<sup>1</sup> and Vladimir Khovaylo<sup>1</sup>

<sup>1</sup> National University of Science and Technology MISIS (NUST MISIS), Leninsky av. 4, Moscow, 119049, Russia

<sup>2</sup> Chemistry Department, University of Turin, 10125, Turin, Italy

\* Corresponding author. E-mail address: aivanova@misis.ru (A. Ivanova).

## XRD data

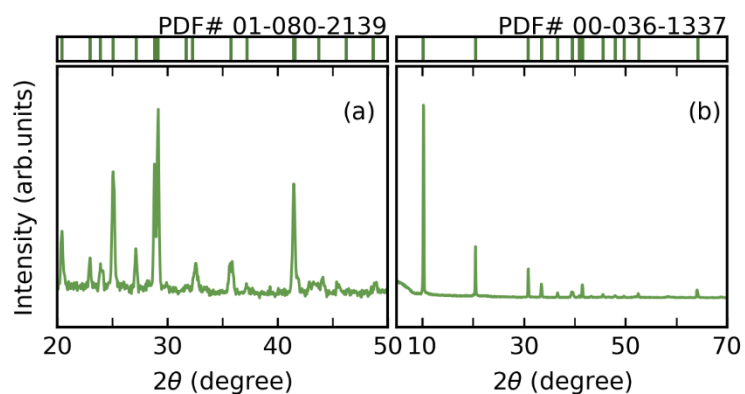

**Fig.S1.** PXRD patterns for (a)  $\text{CsSnI}_3$  and (b)  $\text{TiS}_3$  after synthesis.

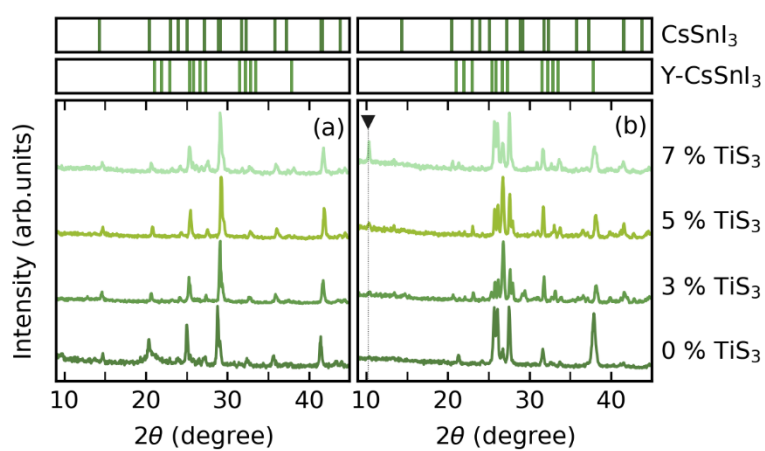

**Fig.S2.** XRD patterns (a) of the surfaces of bulk samples and (b) of the milled samples after pressure-less sinter.

## Raman data

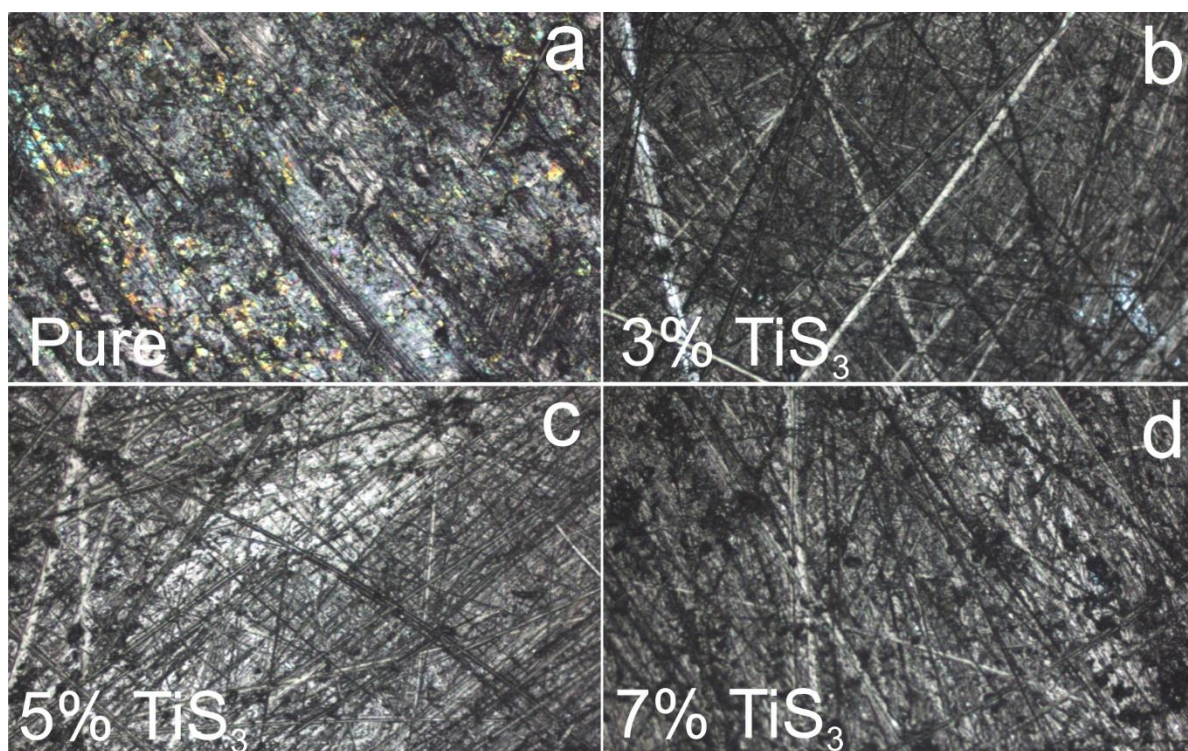

**Fig.S3.** Microphotography with magnification x20 of CsSnI<sub>3</sub> tablets surfaces after 24h air exposure.

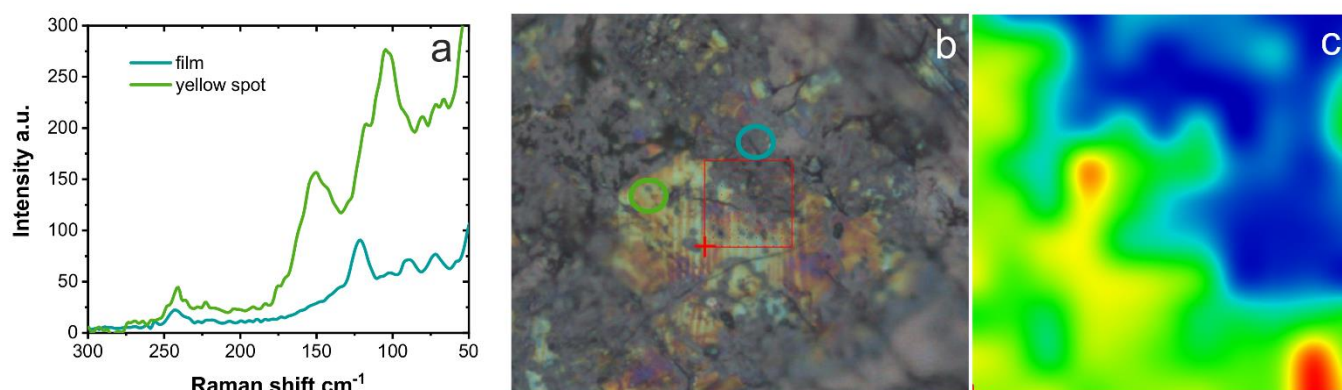

**Fig.S4.** Raman spectra (a) and raman map (b,c) of yellow-black region on surface of pure CsSnI<sub>3</sub> tablet after 24 air exposure.



## SEM images and EDX mapping

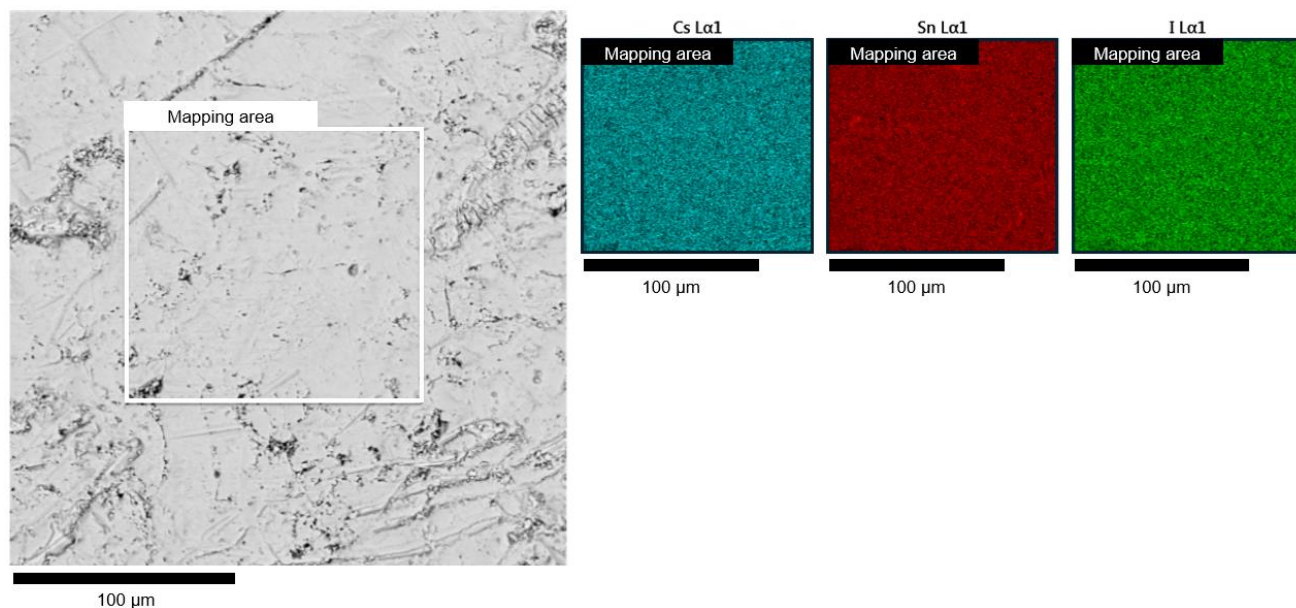

**Fig. S5.** SEM image of the polished surface of the  $\text{CsSnI}_3$  without air exposure specimen and corresponding EDX maps.

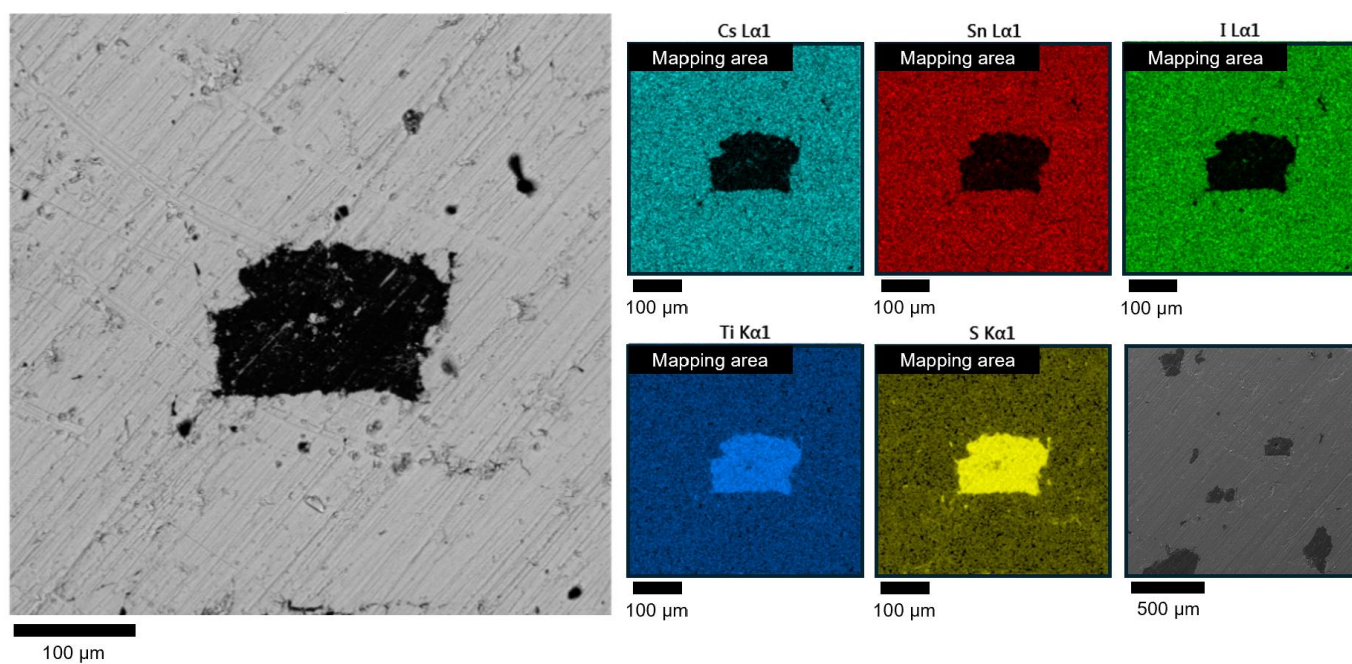

**Fig. S6.** SEM image of the polished surface of the  $\text{CsSnI}_3$  + 3 wt. %  $\text{TiS}_3$  without air exposure specimen and corresponding EDX maps.

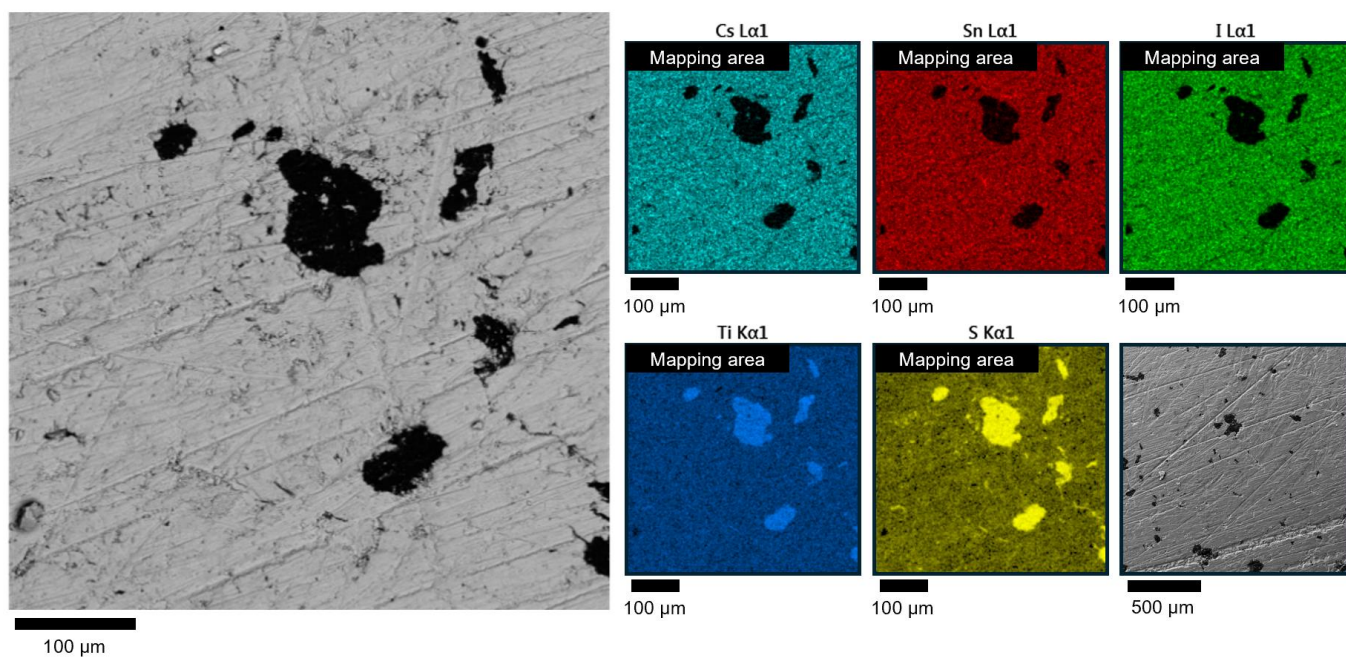

**Fig. S7.** SEM image of the polished surface of the  $\text{CsSnI}_3 + 5 \text{ wt. \% TiS}_3$  without air exposure specimen and corresponding EDX maps.

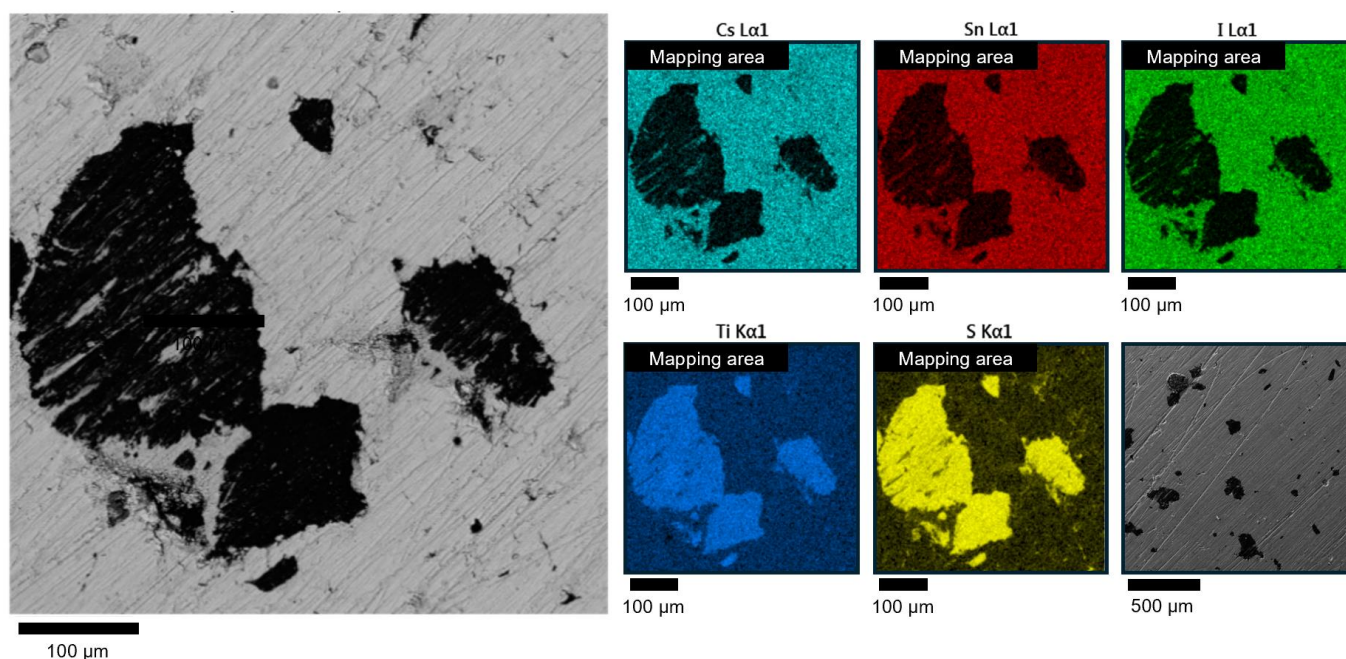

**Fig. S8.** SEM image of the polished surface of the  $\text{CsSnI}_3 + 7 \text{ wt. \% TiS}_3$  without air exposure specimen and corresponding EDX maps.



## XRD data and EDX data

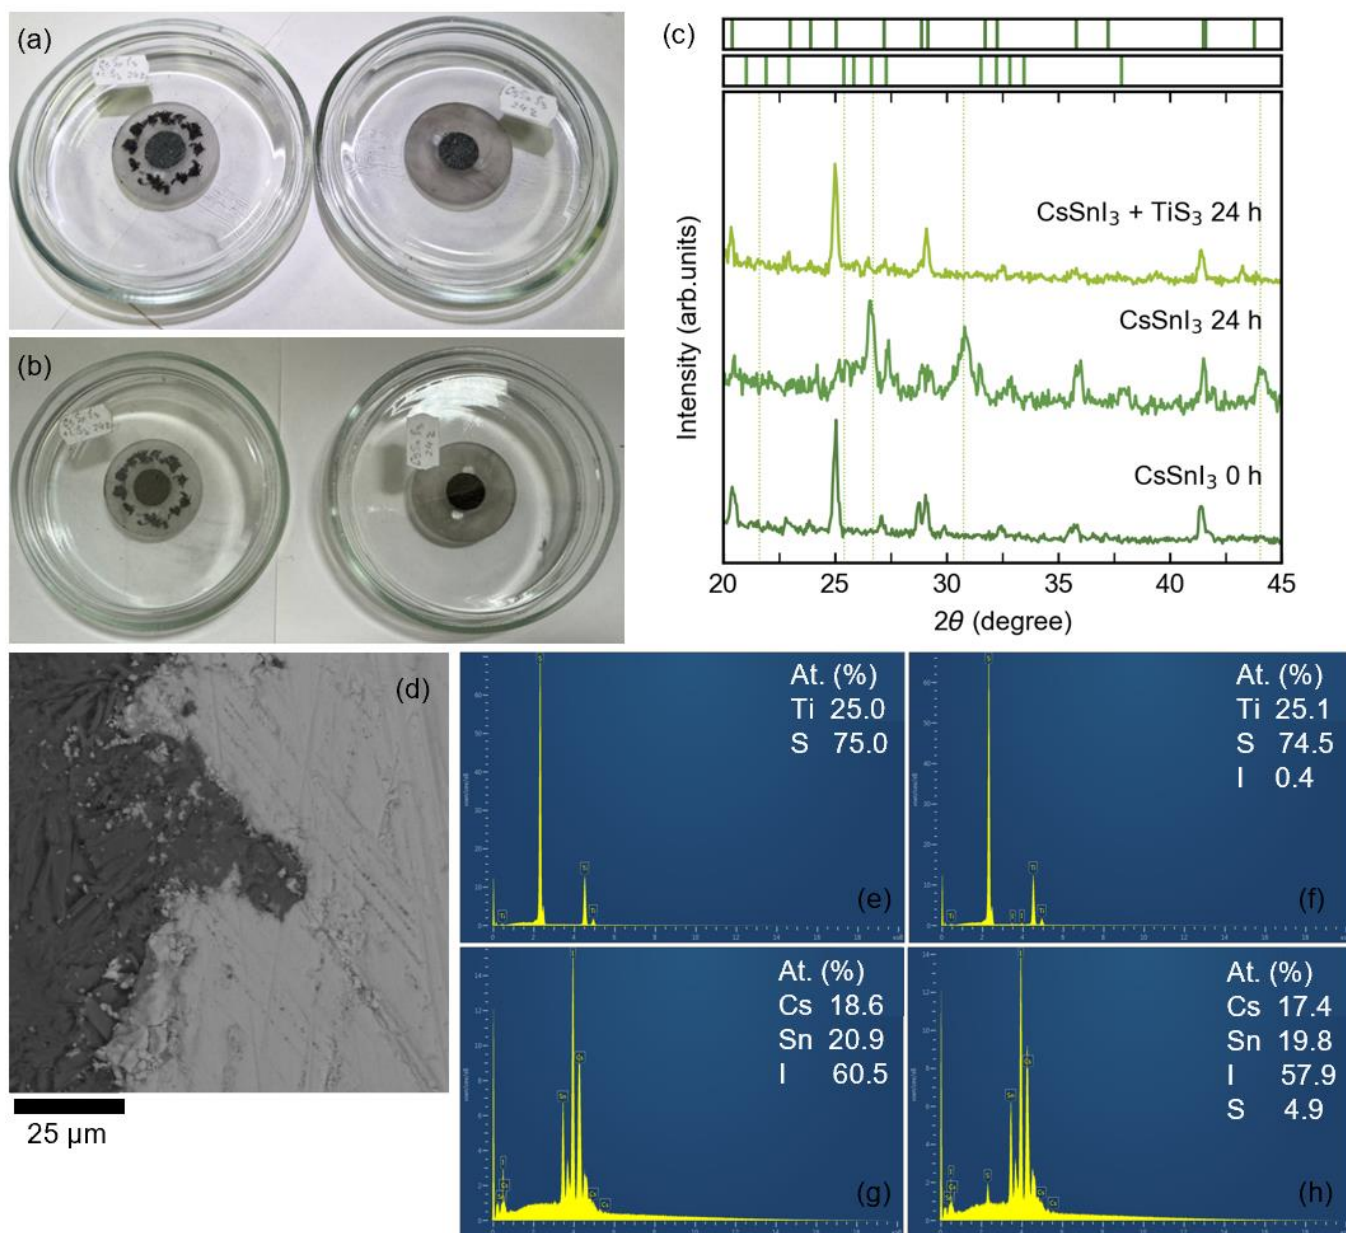

**Fig. S9.** Photos of prepared powders (a) after 5 hours in the box and (b) 24 hours in the air, (c) XRD of these powders, (d) SEM image of the sample  $\text{CsSnI}_3 + 15 \text{ wt.}\% \text{ TiS}_3$ , EDX spectrum analysis (e) of pure  $\text{TiS}_3$ , (f) near the grain boundaries on  $\text{TiS}_3$  side, (g) of pure  $\text{CsSnI}_3$ , (h) near the grain boundaries on  $\text{CsSnI}_3$  side (atomic %).

## Electrical transport properties

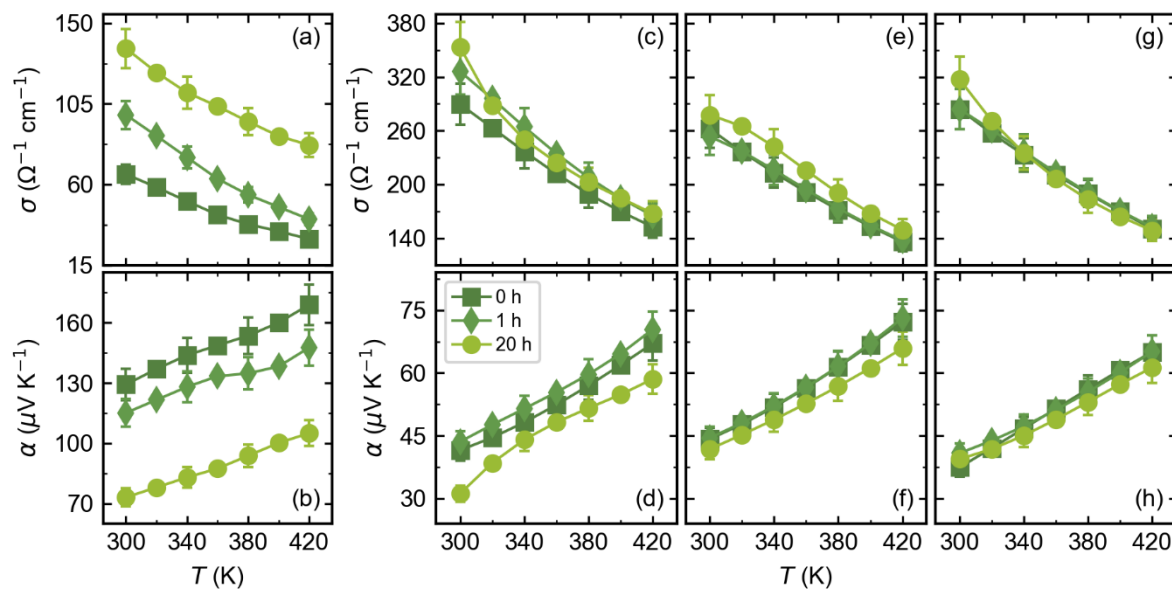

**Fig. S10.** Temperature dependence of electrical conductivity  $\sigma$  and Seebeck coefficient  $\alpha$  of (a, b)  $\text{CsSnI}_3$ , (c, d)  $\text{CsSnI}_3 + 3$  wt.%  $\text{TiS}_3$ , (e, f)  $\text{CsSnI}_3 + 5$  wt.%  $\text{TiS}_3$ , (g, h)  $\text{CsSnI}_3 + 7$  wt.%  $\text{TiS}_3$ .

## Thermal transport properties

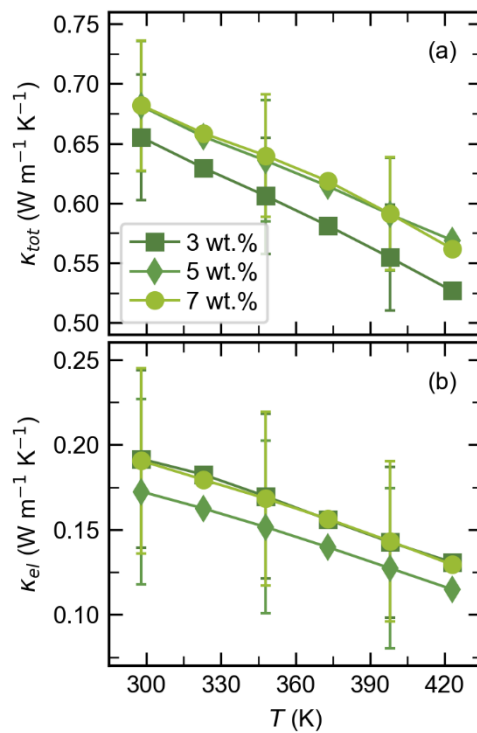

**Fig. S11.** Temperature dependence of (a) the total thermal conductivity and (b) the electrical thermal conductivity of the  $\text{CsSnI}_3 + x \text{ wt.\% TiS}_3$  ( $x = 3, 5$  and  $7 \text{ wt.\%}$ )
